# Supplementary material
Source: PubMed Central journal article supplement (PMC2447667)

## SUPPLEMENTARY FIGURES

**Fig. S1.** Plot of  $\Delta\delta_{\text{ave}}(\text{NH})$  for mThTPase as a function of the protein sequence. The regions exhibiting the largest chemical shift changes are highlighted in gray.

**Fig. S2.** Overlaid 2D [ $^1\text{H}$ ,  $^{15}\text{N}$ ]-HSQC spectra highlight the changes in signals of selected residues induced by the addition of  $\text{Ca}^{2+}$ . The NMR spectra collected with 0, 1 and 2 mM added  $\text{Ca}^{2+}$  are colored in blue, green, and red, respectively. The side chain imino groups of W70 and W128, and the side chain guanidyl group of R125 are labeled with the respective residue name followed by a superscript “ $\epsilon$ ”.

# Supplemental FIGURE. S1

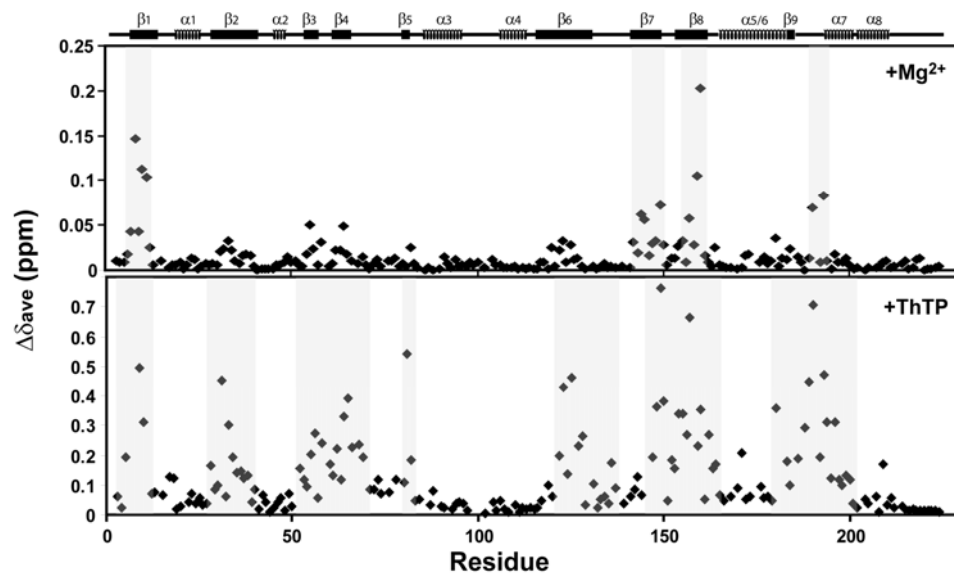

Supplemental FIGURE. S2

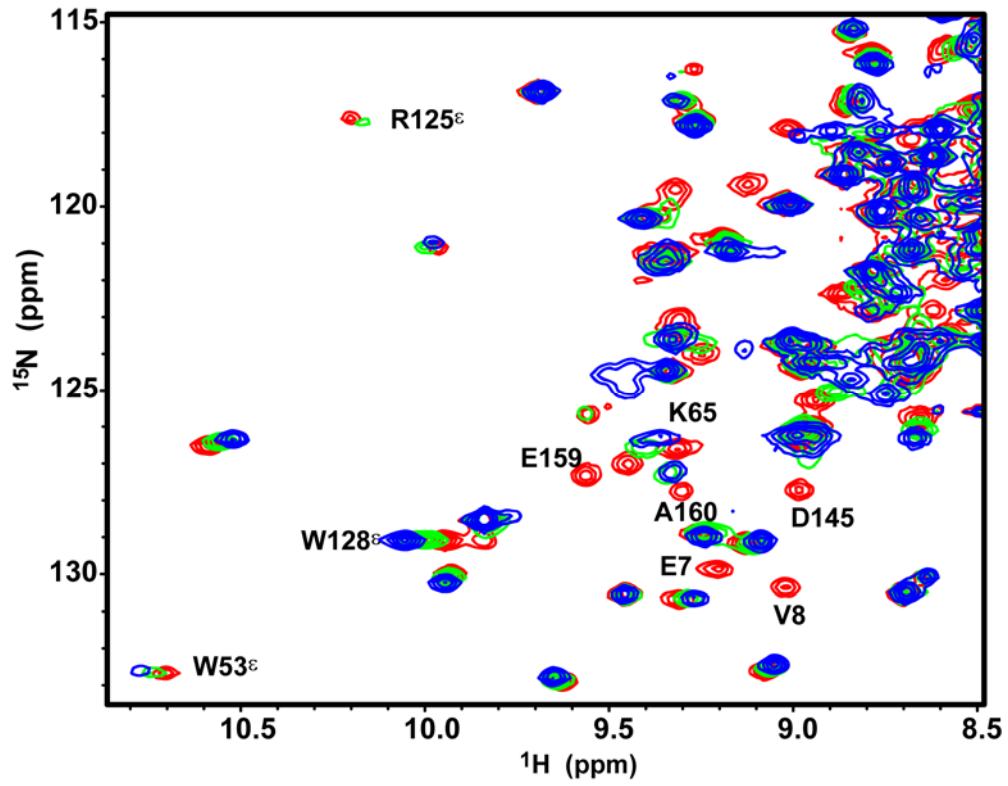

Supplement: M709675200_1.pdf [file M709675200_1.pdf]
